# Supplementary material for: Family history of Alzheimer’s disease alters cognition and is modified by medical and genetic factors
Source: eLife journal article supplement (doi:10.7554/elife.46179), 2019-06-18
Supplement: supp [file elife-46179-supp-v1.zip]

Archive with 6 entries (6 files):
- elife_poa_e46179_Transparent_Reporting_File.docx
- elife_poa_e46179_Supplementary_file_2.docx
- elife_poa_e46179_Figure_1_figure_supplement_1.pdf
- elife_poa_e46179_Source_code_1.pdf
- elife_poa_e46179_Figure_1_figure_supplement_2.pdf
- elife_poa_e46179_Supplementary_file_1.docx
