# Supplementary figures and images for: Family history of Alzheimer’s disease alters cognition and is modified by medical and genetic factors
Source: eLife journal article supplement (doi:10.7554/elife.46179), 2019-06-18

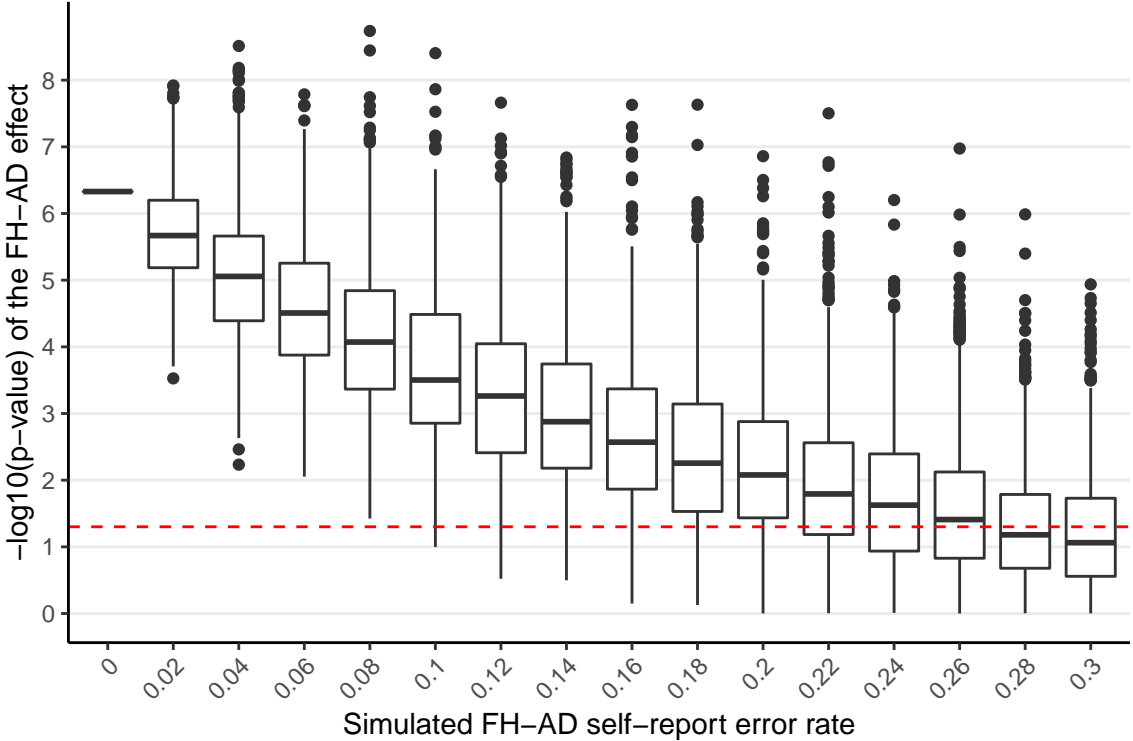

Supplement: supp [file elife-46179-supp-v1.zip]

**A**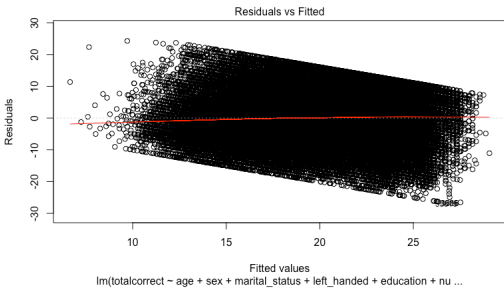**B**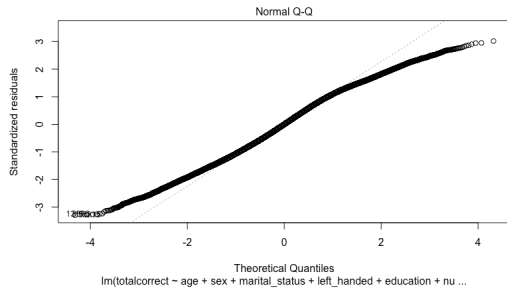**C**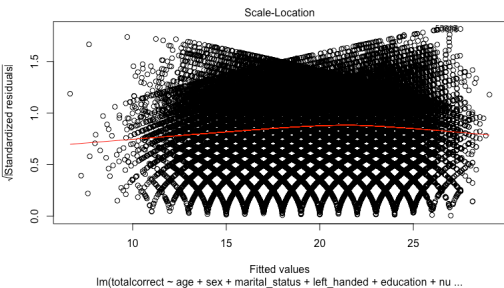**D**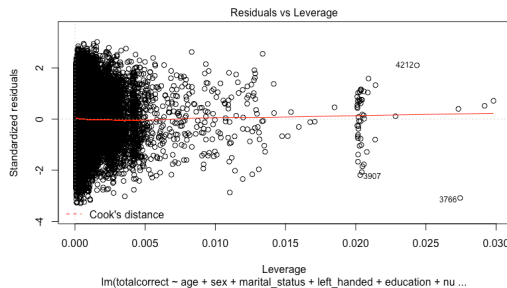

Supplement: supp [file elife-46179-supp-v1.zip]
